# Supplementary material for: Decoding brain states on the intrinsic manifold of human brain dynamics across wakefulness and sleep
Source: Springer Nature journal article supplement (doi:10.1038/s42003-021-02369-7), 2021-07-09
Supplement: MOESM3 [file 42003_2021_2369_MOESM3_ESM.pdf]

## **Description of Additional Supplementary Files**

**File name:** Supplementary Movie 1

**Description:** *Temporal evolution of the fMRI BOLD data during wakefulness and sleep embedded in lower dimensional spaces for one subject.* The video shows the intrinsic three-dimensional manifold of subject 7, with color coding for both (A) sleep stage and (B) time-index. fMRI BOLD data shows smooth intra-stage transitions and inter-stage shortcuts. The frame rate is 10 times faster.
